# Supplementary material for: Tyrosine-Modification of Polypropylenimine (PPI) and Polyethylenimine (PEI) Strongly Improves Efficacy of siRNA-Mediated Gene Knockdown
Source: PubMed Central journal article supplement (PMC7557430; doi:10.3390/nano10091809), 2020-09-10
Supplement: nanomaterials-10-01809-s001.pdf [file nanomaterials-10-01809-s001.pdf]

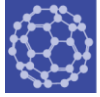

*Supplementary Materials*

# **Tyrosine-Modification of Polypropylenimine (PPI) and Polyethylenimine (PEI) Strongly Improves Efficacy of siRNA-Mediated Gene Knockdown**

**Sandra Noske, Michael Karimov, Achim Aigner \* and Alexander Ewe \***

Rudolf-Boehm-Institute for Pharmacology and Toxicology, Clinical Pharmacology, Leipzig University, Faculty of Medicine, Leipzig, 04107, Germany; Sandra.noske@medizin.uni-leipzig.de (S.N.); michael.karimov@medizin.uni-leipzig.de (M.K.)

\* Correspondence: achim.aigner@medizin.uni-leipzig.de (A.A.); alexander.ewe@medizin.uni-leipzig.de (A.E.); Tel.: +49-(0)341-9724660 (A.A.)

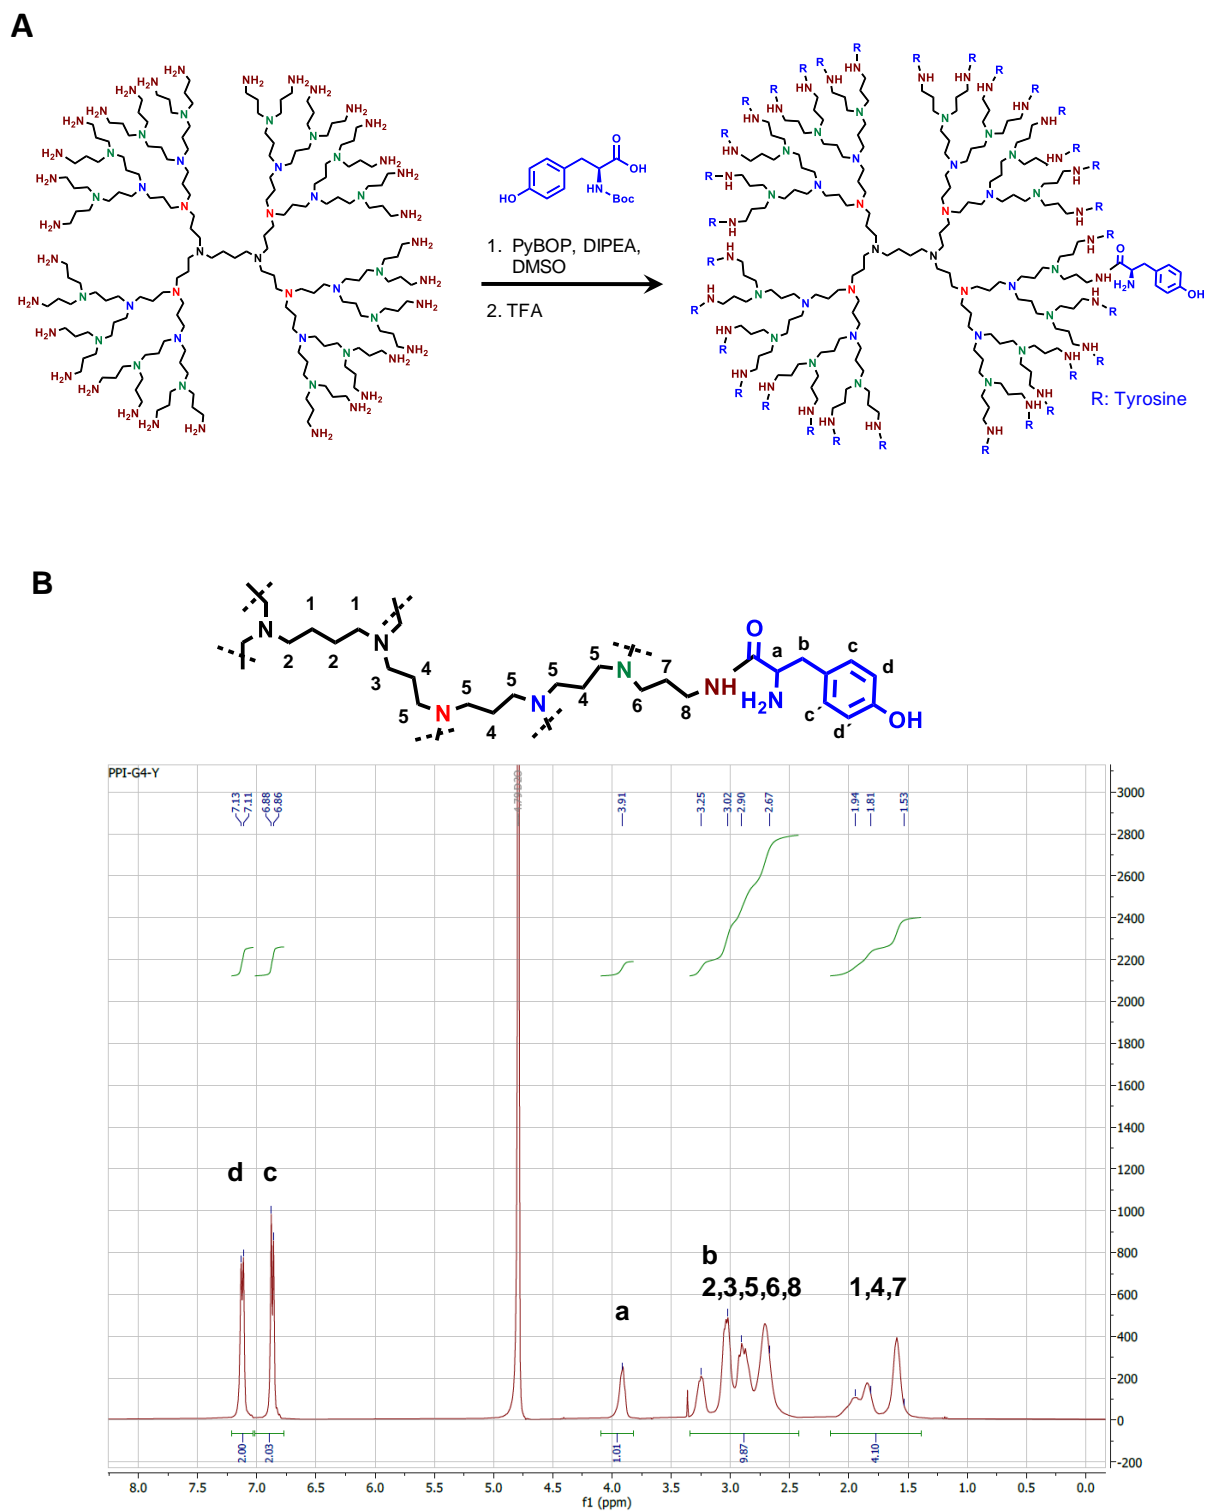

**Figure S1.** (A) Synthesis scheme for the generation of PPI-G4-Y. (B)  $^1\text{H-NMR}$  analysis of PPI-G4-Y. Relevant signals are highlighted.

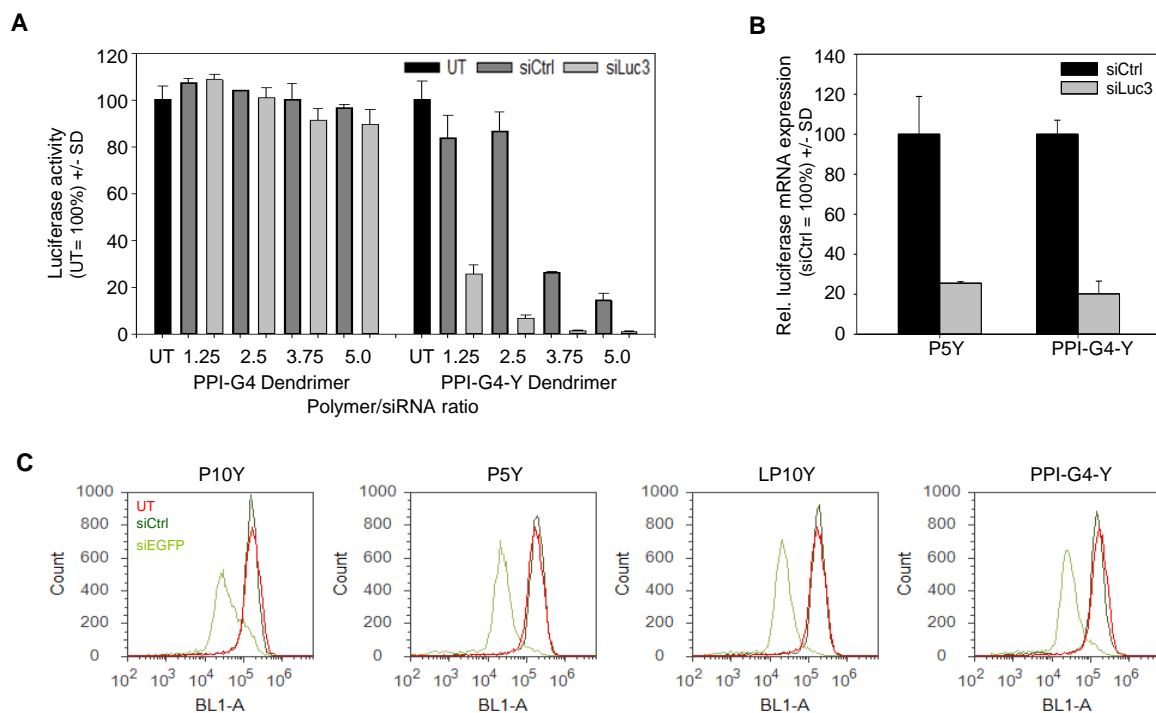

**Figure S2.** (A) Knockdown efficacies of PPI-G4 dendrimer-based siRNA complexes with (right) or without (left) tyrosine modification, as determined by luciferase knockdown in PC3-EGFP/Luc reporter cells. Bars show results upon transfection with complexes containing negative control siRNA (black) or luciferase-specific siRNA (grey), respectively, with bars normalized for untreated (UT) negative control. (B) Luciferase knockdown on the mRNA level in PC3-EGFP/Luc cells, as determined by RT-qPCR. (C) Knockdown efficacies of various tyrosine-modified PPI- or PEI-based siRNA complexes targeting EGFP in PC3-EGFP/Luc cells (original flow cytometry data from Figure 3A).

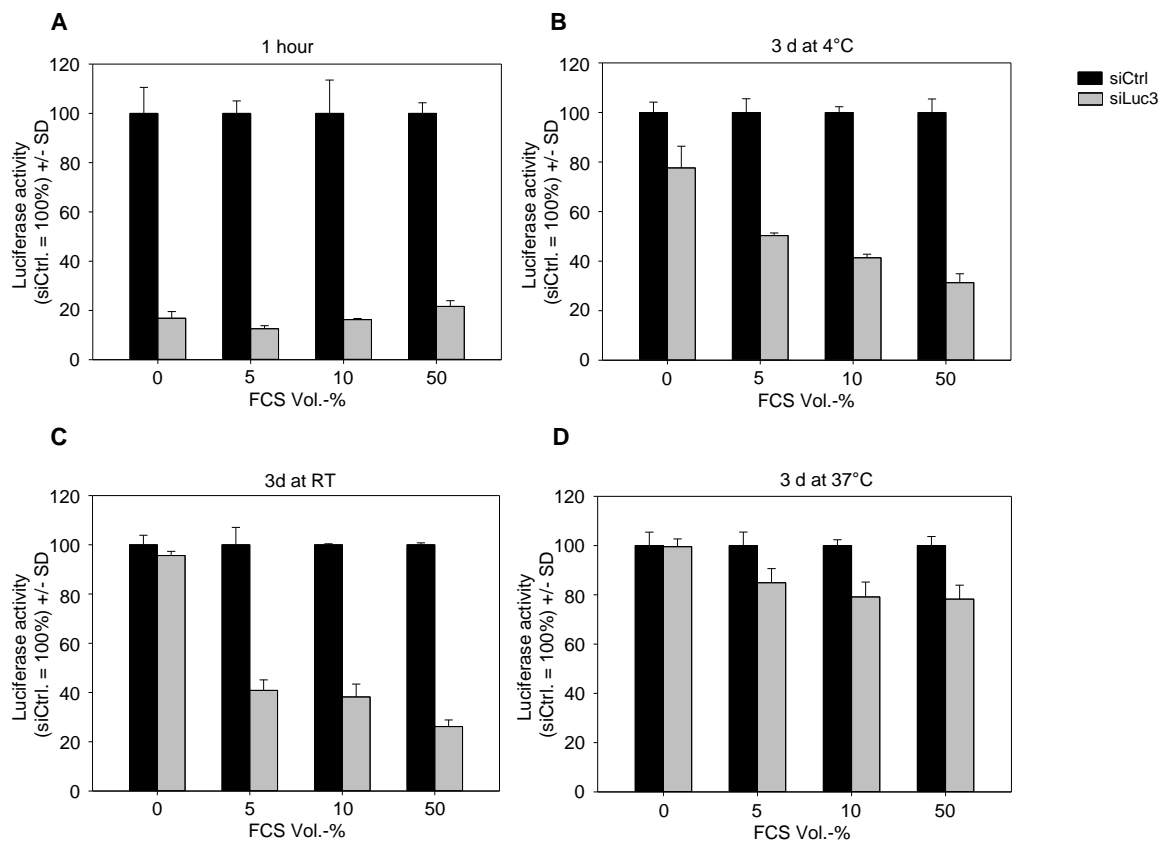

**Figure S3.** Knockdown efficacies of PPI-G4 dendrimer-based siRNA complexes upon storage for three days at different temperatures, in the absence or presence of FCS at the indicated concentrations, as determined by luciferase activity in PC3-EGFP/Luc cells.

**Table S1.** siRNAs used in this study.

| siRNA   |                  | Sequence (5' – 3')       | Vendor                          |
|---------|------------------|--------------------------|---------------------------------|
| siLuc 2 | <i>sense</i>     | CGUACGCGGAAUACUUCGA dTdT | Dharmacon<br>Lafayette, CO, USA |
|         | <i>antisense</i> | UCGAAGUAUCCGCGUACG dTdT  |                                 |
| siLuc 3 | <i>sense</i>     | CUUACGCUGAGUACUUCGA dTdT | Eurogentec, Seraing, Belgium    |
|         | <i>antisense</i> | UCGAAGUACUCAGCGUAAG dTdT |                                 |
| siGAPDH | <i>sense</i>     | CCUCAACUACAUGGUUUAC dTdT | Eurogentec<br>Seraing, Belgium  |
|         | <i>antisense</i> | GUAAACCAUGUAGUUGAGG dTdT |                                 |
| siEGFP  | <i>sense</i>     | GCAGCACGACUUCUUCAAG dTdT | Eurogentec<br>Seraing, Belgium  |
|         | <i>antisense</i> | CUUGAAGAAGUCGUGCUGC dTdT |                                 |

**Table S2.** Sequences of primers used in this study.

| Primer |         | Sequence (5' – 3')      | Vendor                                |
|--------|---------|-------------------------|---------------------------------------|
| RPLP0  | forward | TCTACAACCCTGAAGTGCTTGAT | Eurofins Genomics, Ebersberg, Germany |
|        | reverse | CAATCTGCAGACAGACTGG     |                                       |
| GAPDH  | forward | GGTGTGAACCATGAGAAGTATGA | Bioscience, Gera, Germany             |
|        | reverse | GAGTCCTTCCACGATACCAAAG  |                                       |
| Luc3   | forward | TTACACCCGAGGGGGATGAT    | Eurofins Genomics, Ebersberg, Germany |
|        | reverse | TTCACACACAGTTCGCCTC     |                                       |
